# Supplementary material for: Gag-Pol Processing during HIV-1 Virion Maturation: A Systems Biology Approach
Source: PubMed Central journal article supplement (PMC3675044; doi:10.1371/journal.pcbi.1003103), 2013-06-06

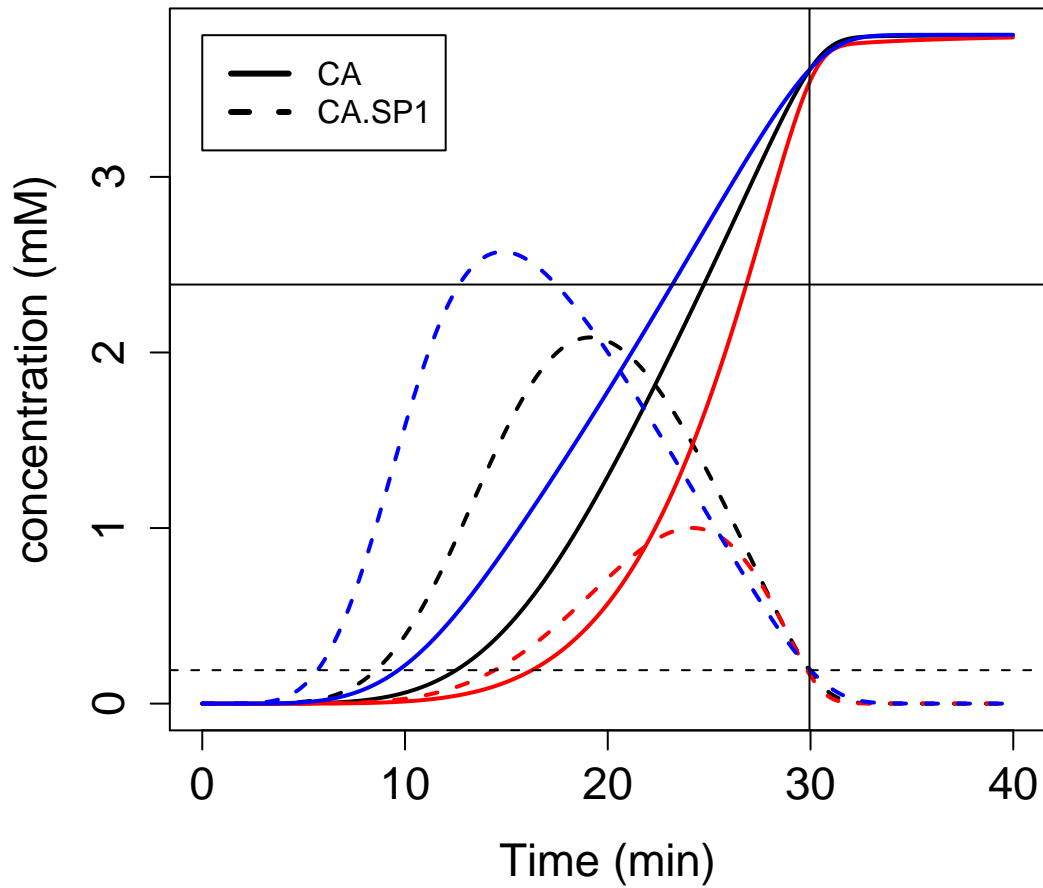

Supplement: pcbi.1003103.s003.pdf [file pcbi.1003103.s003.pdf]
