# Supplementary material for: Gag-Pol Processing during HIV-1 Virion Maturation: A Systems Biology Approach
Source: PLOS journal article supplement (doi:10.1371/journal.pcbi.1003103), 2013-06-06
Supplement: S9 (10.1371/journal.pcbi.1003103.s009) [file journal.pcbi.1003103.s009]

301 Moved Permanently

# Moved Permanently

The document has moved here.

---

Apache Server at www.ploscompbiol.org Port 80
